# Supplementary material for: Molecular and chemical dialogues in bacteria-protozoa interactions
Source: PubMed Central journal article supplement (PMC4542665; doi:10.1038/srep12837), 2015-08-06
Supplement: srep12837-s1.pdf [file srep12837-s1.pdf]

# Molecular and chemical dialogues in bacteria-protozoa interactions

Chunxu Song<sup>1,8#</sup>, Mark Mazzola<sup>2#</sup>, Xu Cheng<sup>1</sup>, Janina Oetjen<sup>4</sup>, Theodore Alexandrov<sup>3,4,5,6,7</sup>,  
Pieter Dorrestein<sup>6</sup>, Jeramie Watrous<sup>6</sup>, Menno van der Voort<sup>1</sup>, Jos M. Raaijmakers<sup>1,8\*</sup>

<sup>1</sup>Laboratory of Phytopathology, Wageningen University, 6708 PB Wageningen, the Netherlands

<sup>2</sup>USDA-ARS, 1104 N. Western Ave., Wenatchee, Washington 98801

<sup>3</sup>MALDI Imaging Lab, University of Bremen, 28359 Bremen, Germany

<sup>4</sup>Center for Industrial Mathematics, University of Bremen, 28359 Bremen, Germany

<sup>5</sup>SCiLS GmbH, 28359 Bremen, Germany

<sup>6</sup>Skaggs School of Pharmacy and Pharmaceutical Sciences, University of California at San Diego, San Diego, California 92093, United States

<sup>7</sup>Structural and Computational Biology Unit, European Molecular Biology Laboratory (EMBL), 69117 Heidelberg, Germany

<sup>8</sup>Microbial Ecology Department, Netherlands Institute of Ecology (NIOO-KNAW), 6708PB Wageningen, the Netherlands

<sup>#</sup>These authors contributed equally to this work.

\*Corresponding author: [j.raaijmakers@nioo.knaw.nl](mailto:j.raaijmakers@nioo.knaw.nl); P:+31 317473497; F:+31 317473675

**Figure S1.** The number of genes that are up-regulated (Blue) or down-regulated (Red) in *P. fluorescens* SS101 cells exposed to *N. americana*. The genes are categorized into COGs A thru X (for specification of each of the COGs, see Table S1). Some genes can be placed in more than one COG and thus counted more than once.

**Figure S2.** MALDI imaging mass spectrometry (IMS) shows no production of massetolide A during the  $\Delta$ *massA* mutant-*N. americana* interaction. a.u. = arbitrary units.

**Figure S3.** Whole genome transcriptome analysis of *P. fluorescens* strains SS101 and SBW25 in the presence of *N. americana*. Heat maps showing log<sub>2</sub>-fold changes in the expression of genes that are differentially regulated in both SS101 (A) and SBW25 (B) upon protozoan grazing. Wild type SS101 and SBW25 were grown on 1/5 NBY plates at 25°C in the presence of *N. americana* for 2-3 days. Cells were collected and total RNA was extracted followed by cDNA synthesis, labelling and hybridization to a SS101/SBW25 whole-genome tiling microarray. The fold changes shown here represent averages of four biological replicates. For a list of all genes differentially regulated in SS101 and SBW25, we refer to Supplementary Tables S1 and S3.

**Figure S4.** (A) MALDI imaging mass spectrometry (IMS) shows production of viscosin and its derivatives during the *P. fluorescens* SBW25-*N. americana* interaction. a.u. = arbitrary units. (B) MS/MS network analysis and annotation of ion clusters from the *P. fluorescens* SBW25-*N. americana* interaction. Ion clusters in the black square represents the lipopeptide viscosin and its derivatives; the black circle represents the 325 m/z ion cluster; the grey square represents the 766 m/z ion cluster. (C) MS/MS analysis further indicated that the parent ion

with 1148.70 m/z detected in the *P. fluorescens* SBW25- *N. americana* interaction is most likely viscosin.

**Figure S5.** Box plots depicting the production of viscosin and its derivatives in *P. fluorescens* SBW25 alone, *N. americana* alone, *P. fluorescens* SBW25-*N. americana* interaction and *viscA* mutant alone. The box plots represent the median intensity in arbitrary units after TIC normalization (horizontal line), the upper and lower quartiles (box layout, spectra in which the intensities are within a range of 25% - 75% of the data), the upper and lower quantiles (dashed lines, spectra in which the intensities are within a range of 1% - 99%) as well as the outliers (spectra with intensities greater than 99% and lower than 1% of the data).

**Figure S6.** MALDI imaging mass spectrometry (IMS) shows production of 88 m/z ions in the *P. fluorescens* SS101-*N. americana* (A) and *P. fluorescens* SBW25-*N. americana* (B) interactions respectively. a.u. = arbitrary units.

**Figure S7.** (A) MALDI imaging mass spectrometry (IMS) shows production of 311-477 m/z ions and its cluster ions in the MS/MS network in *P. fluorescens* SBW25-*N. americana* interaction. a.u. = arbitrary units. (B) MS/MS profile of 325 m/z during the *P. fluorescens* SBW25-*N. americana*. (C) MALDI imaging mass spectrometry (IMS) shows production of 752-809 m/z ions and its cluster ions in the MS/MS network in *P. fluorescens* SBW25-*N. americana* interaction. a.u. = arbitrary units. (D) MS/MS profile of 766 m/z during the *P. fluorescens* SBW25-*N. americana*

**Figure S8.** MS/MS profile of 843 m/z (A) and 868 m/z (B) during the *P. fluorescens* SBW25-*N. americana* interaction.

**Figure S9.** MS/MS profile of 883 m/z (A) and 897 m/z (B) during the *P. fluorescens* SBW25-*N. americana* interaction.

**Table S1.** Whole genome transcriptome analysis of *P. fluorescens* strain SS101 in the presence of *N. americana*

**Table S2.** Co-localization ions of the MALDI-IMS of *P. fluorescens* strain SS101 in the presence of *N. americana*

**Table S3.** Whole genome transcriptome analysis of *P. fluorescens* strain SBW25 in the presence of *N. americana*

**Table S4.** Ion clusters of the lipopeptide massetolide A and its derivatives in *P. fluorescens* strain SS101 interaction with *N. americana*

**Table S5.** Ion cluster of 325-477 m/z in *P. fluorescens* strain SS101 interaction with *N. americana*

**Table S6.** Ion cluster of 766-796 m/z in *P. fluorescens* strain SS101 interaction with *N. americana*

Figure S1

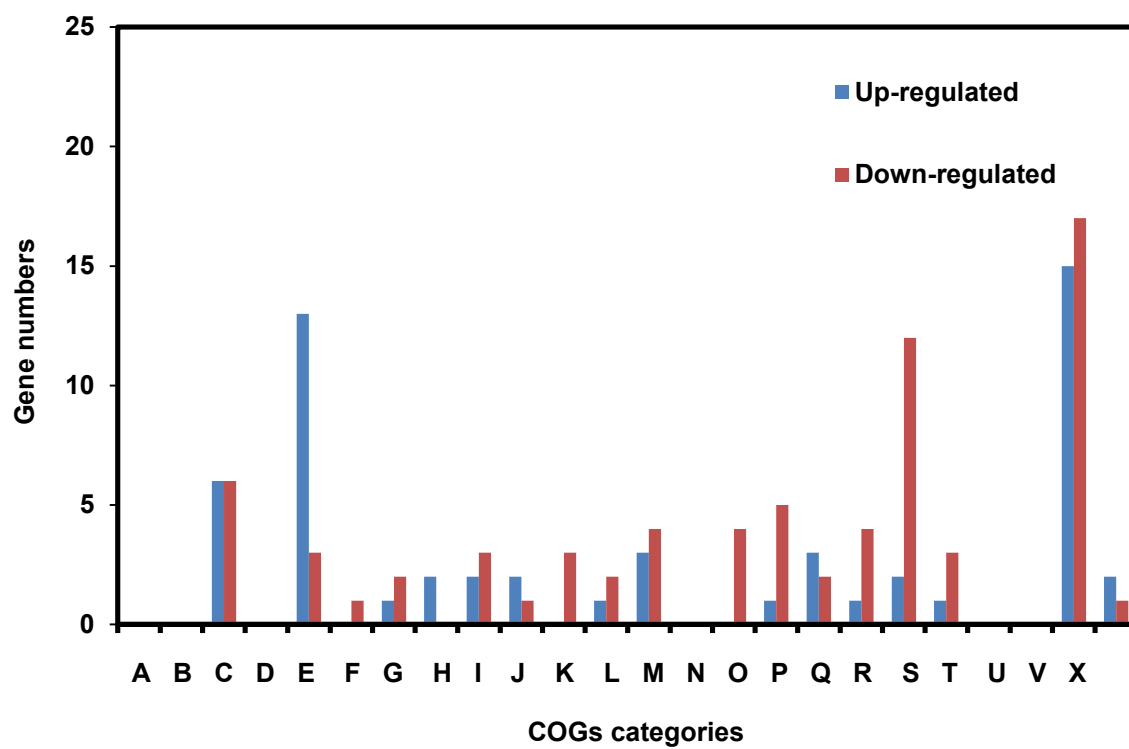

Figure S2

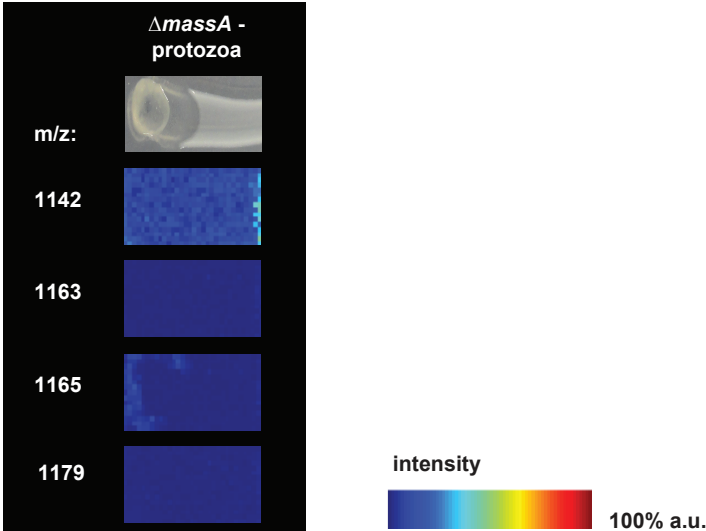

Figure S3

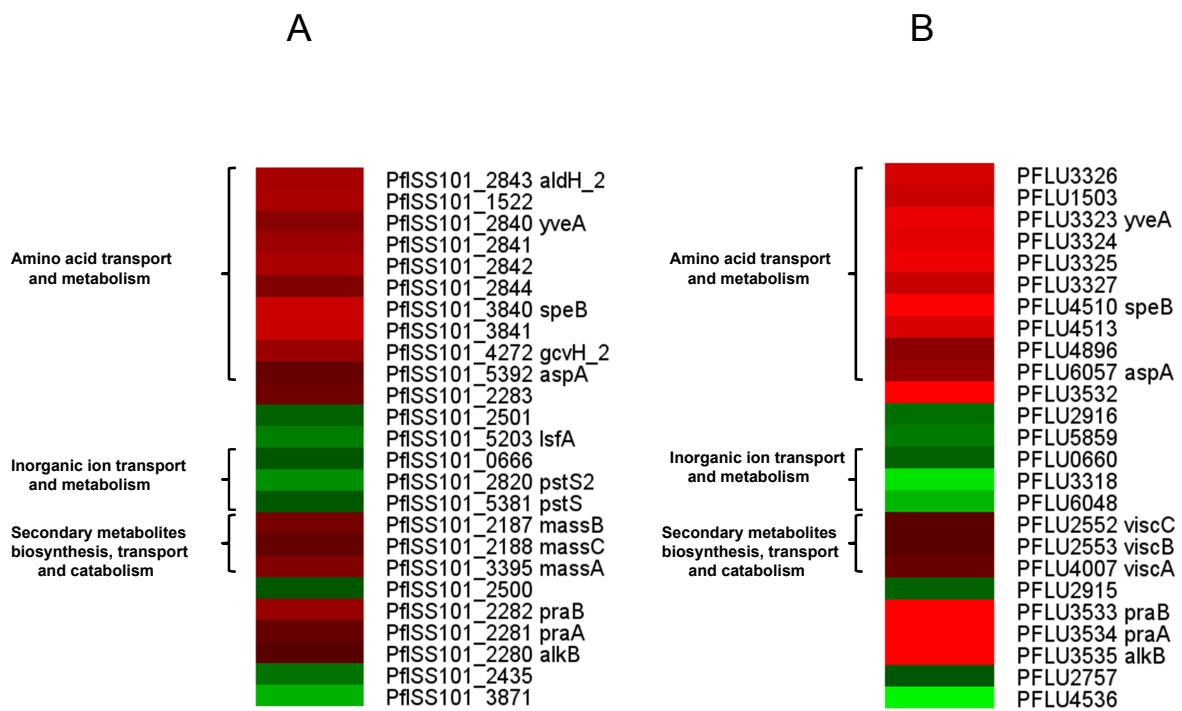





Figure S5

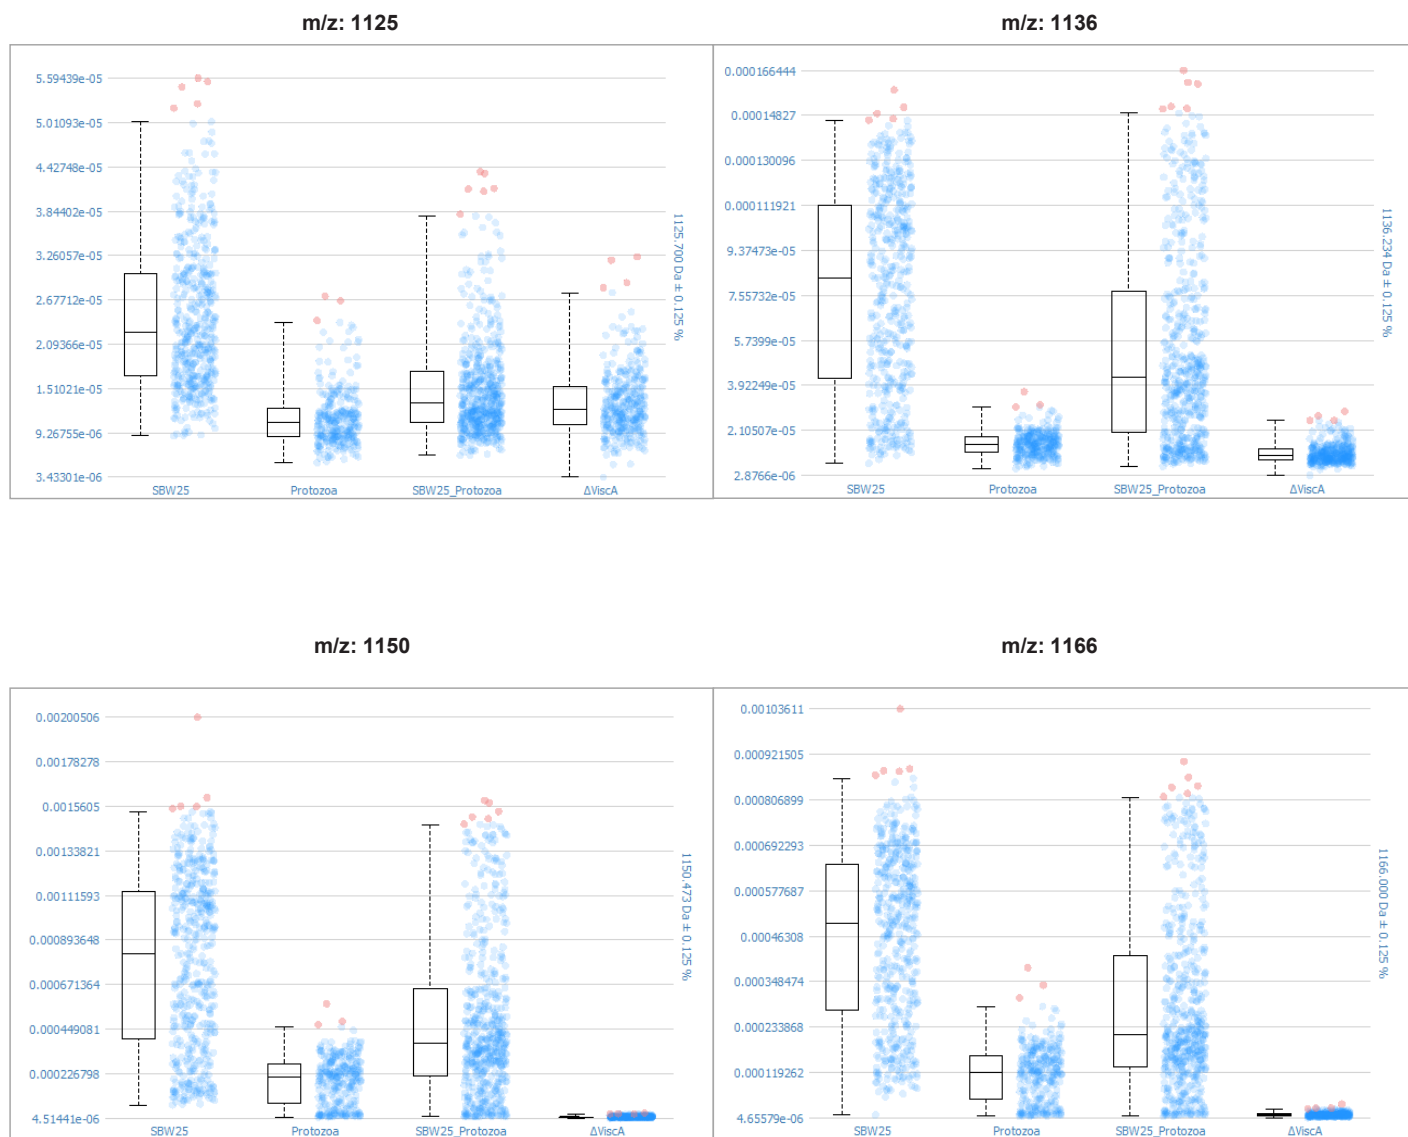

Figure S6

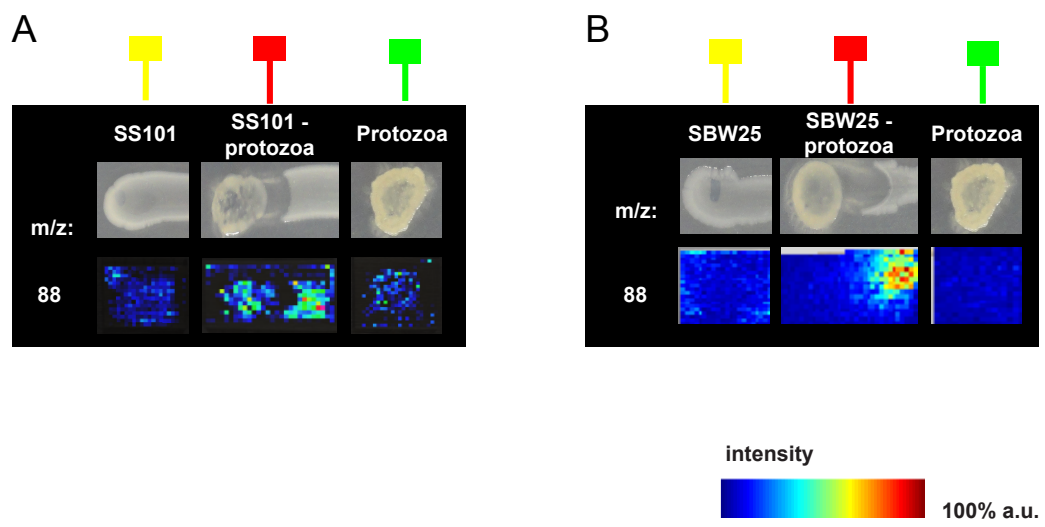

Figure S7

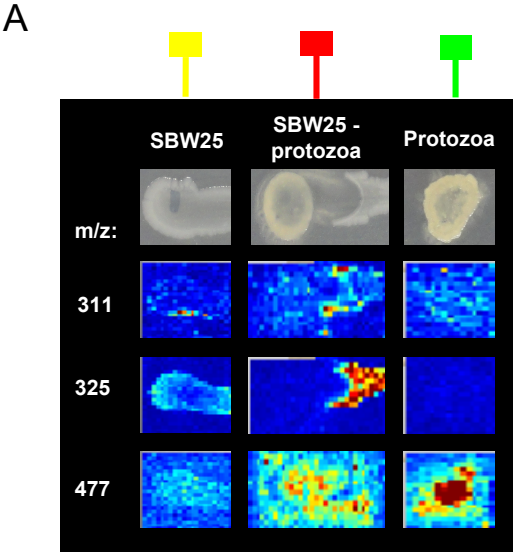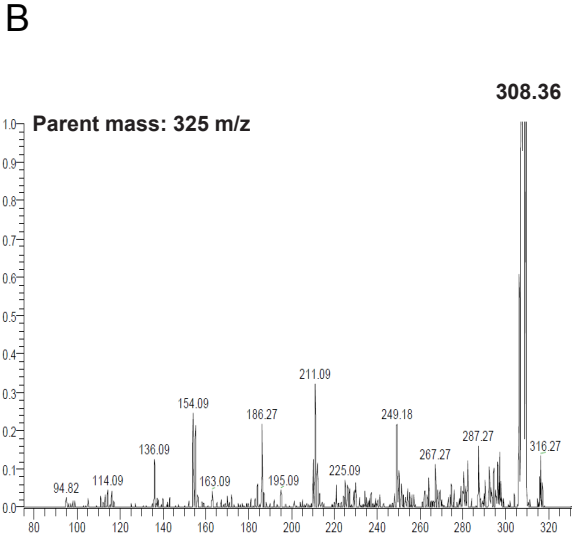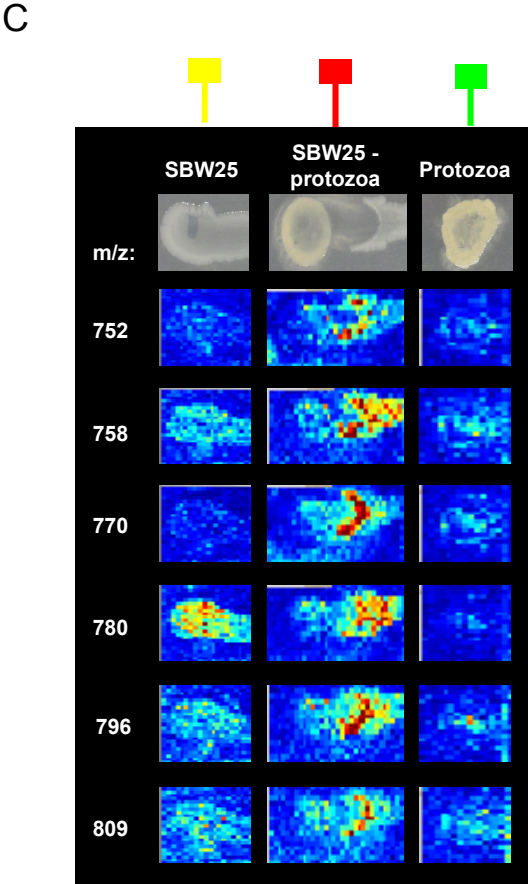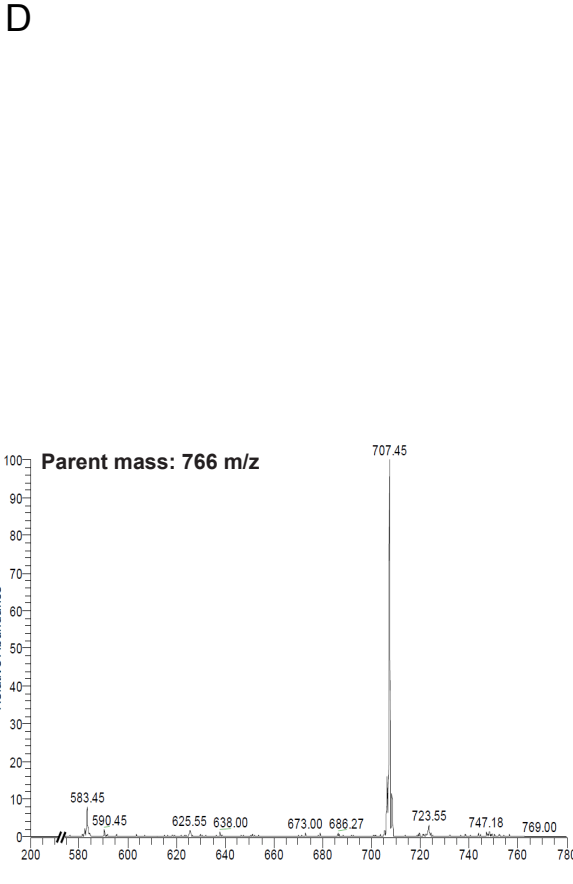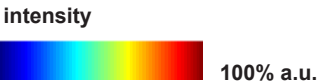

Figure S8

A

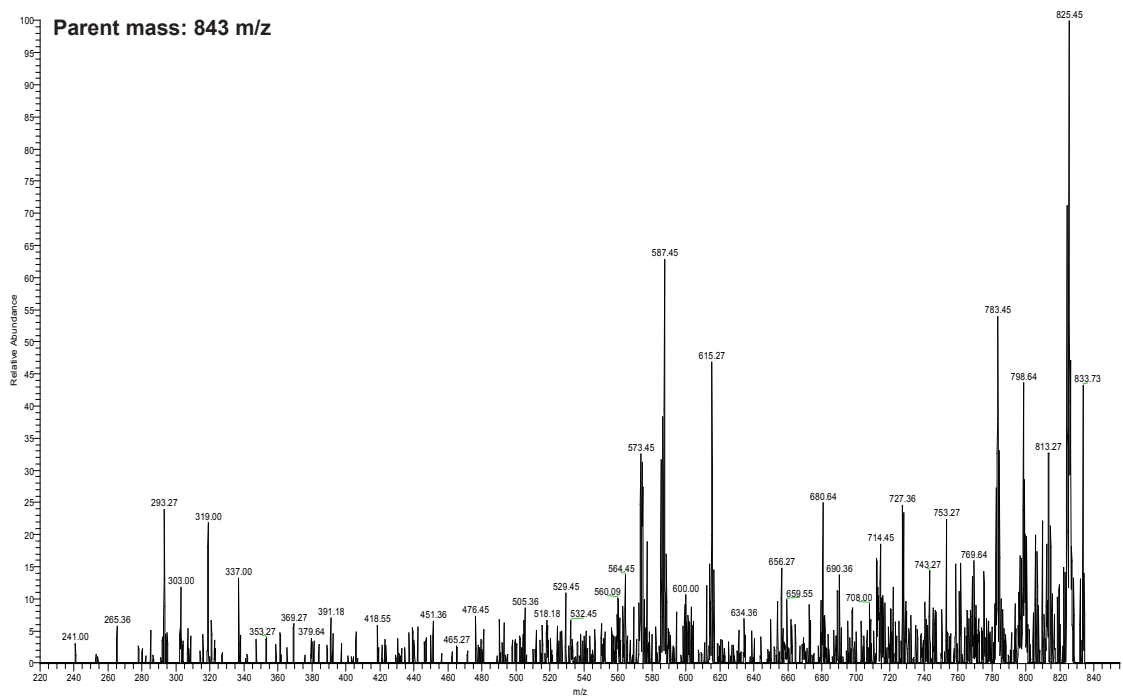

B

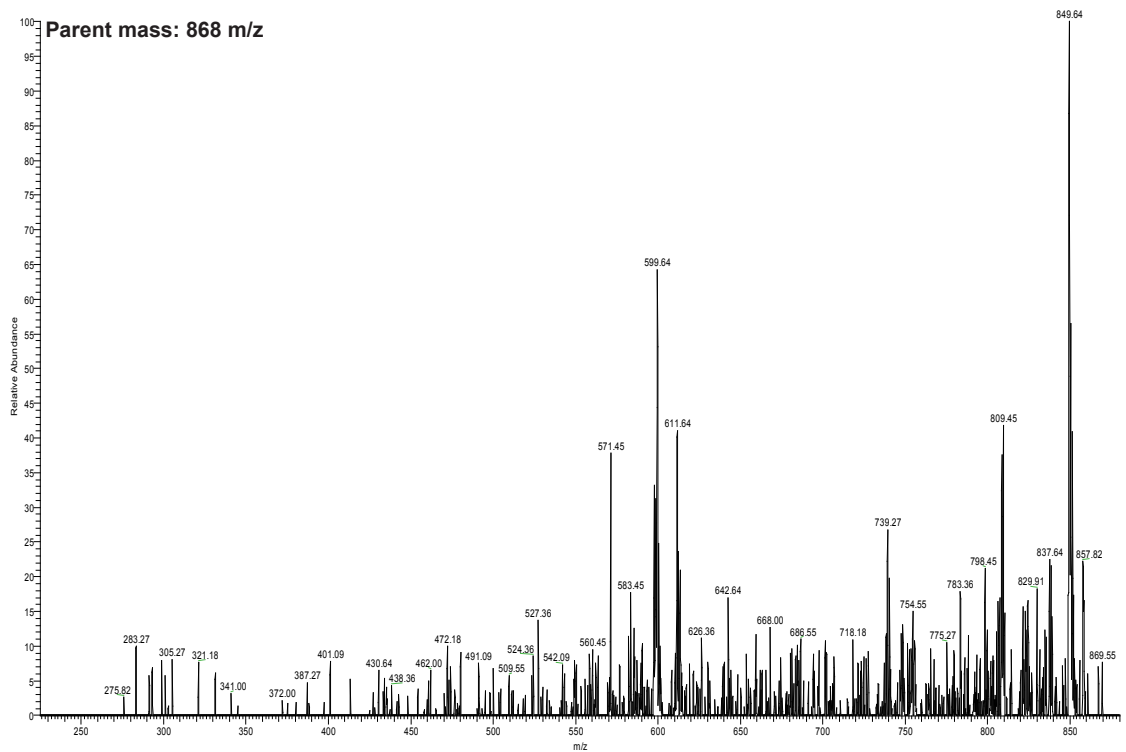

Figure S9

A

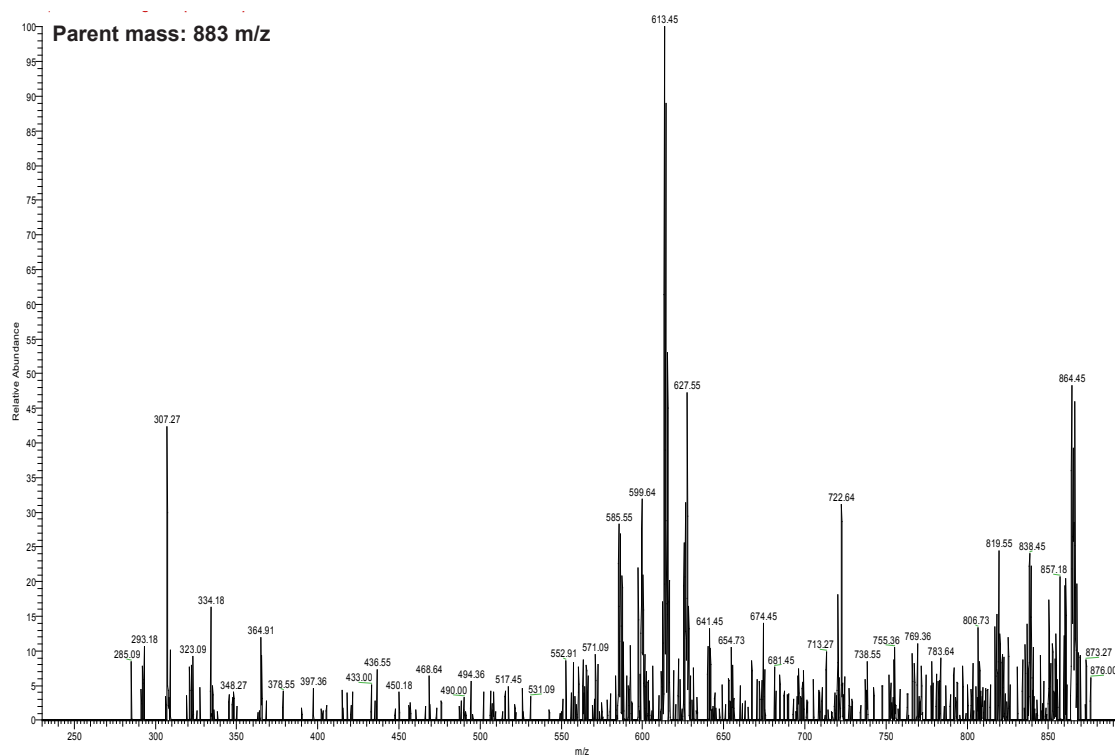

B

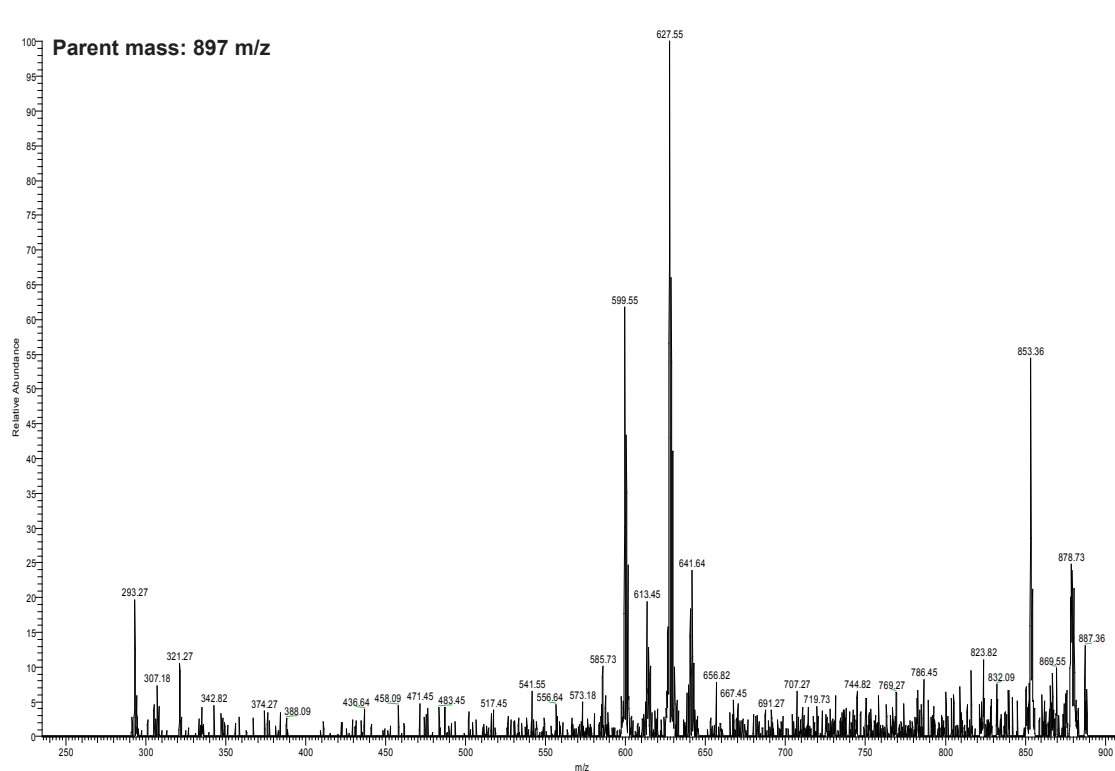

| Locustag     | Fold change | P value-FDR | Gene names | Gene description                                                             | COG         | COG description                                              |
|--------------|-------------|-------------|------------|------------------------------------------------------------------------------|-------------|--------------------------------------------------------------|
| PFSS101_0103 | 2.385765679 | down        |            | conserved hypothetical protein                                               | X           | Not in COGs                                                  |
| PFSS101_0137 | 2.047757654 | down        |            | RNA polymerase sigma-70 factor, ECF family                                   | K           | Transcription                                                |
| PFSS101_0176 | 2.095470647 | down        |            | von Willebrand factor type A domain protein                                  | R           | General function prediction only                             |
| PFSS101_0230 | 2.28208116  | down        |            | histidine triad domain protein                                               | F           | Nucleotide transport and metabolism                          |
| PFSS101_0314 | 2.193433447 | down        |            | transporter, major facilitator family                                        | G           | Carbohydrate transport and metabolism                        |
| PFSS101_0475 | 2.486267567 | up          | putP       | sodium_proline symporter                                                     | E           | Amino acid transport and metabolism                          |
| PFSS101_0551 | 2.2322552   | up          | rplH       | ribosomal protein L9                                                         | J           | Translation                                                  |
| PFSS101_0566 | 3.097485781 | up          | pcdI       | piperidine-6-carboxylate dehydrogenase                                       | C           | Energy production and conversion                             |
| PFSS101_0567 | 2.722925425 | up          |            | FAD dependent oxidoreductase                                                 | E           | Amino acid transport and metabolism                          |
| PFSS101_0606 | 2.050752163 | up          | oprC       | TonB-dependent outer membrane copper receptor OprC                           | P           | Inorganic ion transport and metabolism                       |
| PFSS101_0666 | 2.043928112 | down        |            | putative copper chaperone CopZ                                               | P           | Inorganic ion transport and metabolism                       |
| PFSS101_0697 | 2.463279917 | down        |            | conserved hypothetical protein                                               | X           | Not in COGs                                                  |
| PFSS101_0855 | 2.434810978 | down        |            | PF04402 family protein                                                       | S           | Function unknown                                             |
| PFSS101_0875 | 3.788087919 | down        | kdgD       | 5-dehydro-4-deoxyglucarate dehydratase                                       | E           | Amino acid transport and metabolism                          |
| PFSS101_0876 | 3.51623279  | down        |            | aldehyde dehydrogenase family protein                                        | C           | Energy production and conversion                             |
| PFSS101_1118 | 2.140944484 | down        | rpmE_2     | ribosomal protein L31                                                        | J           | Translation                                                  |
| PFSS101_1337 | 2.221079343 | down        | dctA       | aerobic C4-dicarboxylate transport protein                                   | C           | Energy production and conversion                             |
| PFSS101_1413 | 2.047787905 | up          | adhB       | alcohol dehydrogenase II                                                     | C           | Energy production and conversion                             |
| PFSS101_1522 | 4.090725899 | up          |            | putative thiamine pyrophosphate enzyme                                       | E           | Amino acid transport and metabolism                          |
| PFSS101_1544 | 2.008988422 | down        |            | conserved hypothetical protein                                               | X           | Not in COGs                                                  |
| PFSS101_1559 | 2.504130112 | down        |            | conserved hypothetical protein                                               | M           | Cell wall/membrane biogenesis                                |
| PFSS101_1574 | 2.030911904 | down        | fadA       | acetyl-CoA C-acyltransferase FadA                                            | I           | Lipid transport and metabolism                               |
| PFSS101_1618 | 9.950917244 | up          |            | conserved hypothetical protein                                               | X           | Not in COGs                                                  |
| PFSS101_1619 | 6.251049519 | up          |            | conserved hypothetical protein                                               | X           | Not in COGs                                                  |
| PFSS101_1620 | 4.24153614  | up          |            | integral membrane protein, PF00892 family                                    | X           | Not in COGs                                                  |
| PFSS101_1621 | 3.246046782 | up          |            | putative lipoprotein                                                         | X           | Not in COGs                                                  |
| PFSS101_1709 | 2.046893358 | up          | oprI       | outer membrane lipoprotein OprI                                              | X           | Not in COGs                                                  |
| PFSS101_1727 | 2.330752386 | down        |            | conserved domain protein                                                     | S           | Function unknown                                             |
| PFSS101_1998 | 2.754859345 | down        |            | thioesterase family protein                                                  | Q           | Secondary metabolites biosynthesis, transport and catabolism |
| PFSS101_2013 | 2.290246395 | down        |            | conserved hypothetical protein                                               | S           | Function unknown                                             |
| PFSS101_2057 | 2.653518132 | down        |            | conserved hypothetical protein                                               | X           | Not in COGs                                                  |
| PFSS101_2063 | 2.082899888 | down        |            | oxidoreductase, short chain dehydrogenase/reductase family                   | R           | General function prediction only                             |
| PFSS101_2065 | 2.468221669 | down        |            | putative membrane protein, PF07300 family                                    | S           | Function unknown                                             |
| PFSS101_2089 | 2.038626598 | down        |            | conserved hypothetical protein                                               | X           | Not in COGs                                                  |
| PFSS101_2090 | 2.562253545 | down        |            | conserved hypothetical protein                                               | X           | Not in COGs                                                  |
| PFSS101_2092 | 2.377497433 | down        |            | ATP-dependent Clp protease, proteolytic subunit ClpP-like protein            | O           | Posttranslational modification, protein turnover, chaperones |
| PFSS101_2094 | 2.132504391 | down        |            | conserved domain protein                                                     | X           | Not in COGs                                                  |
| PFSS101_2098 | 2.373236585 | down        |            | hypothetical protein                                                         | X           | Not in COGs                                                  |
| PFSS101_2099 | 2.644422548 | down        |            | conserved hypothetical protein                                               | S           | Function unknown                                             |
| PFSS101_2187 | 2.641467571 | up          | massB      | non-ribosomal peptide synthetase MassB                                       | Q           | Secondary metabolites biosynthesis, transport and catabolism |
| PFSS101_2188 | 2.27959492  | up          | massC      | non-ribosomal peptide synthetase MassC                                       | Q           | Secondary metabolites biosynthesis, transport and catabolism |
| PFSS101_2192 | 4.550174713 | up          | megL       | methionine gamma-lyase                                                       | E           | Amino acid transport and metabolism                          |
| PFSS101_2195 | 2.409641981 | up          | alkG       | rubredoxin 2                                                                 | C           | Energy production and conversion                             |
| PFSS101_2196 | 2.501330853 | up          |            | AP endonuclease, family 2                                                    | G           | Carbohydrate transport and metabolism                        |
| PFSS101_2210 | 2.359759951 | down        | budC       | diacetyl reductase S-acetoin forming                                         | I           | Lipid transport and metabolism                               |
| PFSS101_2211 | 2.033169922 | down        | acoR       | acetoin catabolism regulatory protein                                        | Q           | Secondary metabolites biosynthesis, transport and catabolism |
| PFSS101_2212 | 8.304666507 | down        | acoA       | acetoin dehydrogenase E1 component, alpha subunit                            | C           | Energy production and conversion                             |
| PFSS101_2213 | 7.958622527 | down        | acoB       | acetoin dehydrogenase E1 component, beta subunit                             | C           | Energy production and conversion                             |
| PFSS101_2214 | 6.834233378 | down        | acoC       | acetoin dehydrogenase E2 component, dihydrolypoamide acetyltransferase       | R           | General function prediction only                             |
| PFSS101_2280 | 2.072992563 | up          | alkB       | alkane 1-monoxygenase                                                        | X           | Not in COGs                                                  |
| PFSS101_2281 | 2.323854923 | up          | praA       | protein activator of alkane oxidation PraA                                   | X           | Not in COGs                                                  |
| PFSS101_2282 | 3.498092413 | up          | praB       | protein activator of alkane oxidation PraB                                   | X           | Not in COGs                                                  |
| PFSS101_2283 | 2.478863239 | up          |            | putative outer membrane protein                                              | I           | Lipid transport and metabolism                               |
| PFSS101_2291 | 2.107859135 | up          |            | BNR_Asp-box repeat domain protein                                            | R           | General function prediction only                             |
| PFSS101_2340 | 2.6029376   | down        |            | conserved hypothetical protein                                               | Not in COGs | Not in COGs                                                  |
| PFSS101_2379 | 2.233312157 | down        |            | conserved hypothetical protein                                               | S           | Function unknown                                             |
| PFSS101_2435 | 2.575838889 | down        |            | conserved hypothetical protein                                               | X           | Not in COGs                                                  |
| PFSS101_2436 | 2.446096538 | down        |            | Mg2+ transporter-C, MgtC family                                              | S           | Function unknown                                             |
| PFSS101_2496 | 2.138371789 | down        | ligD       | DNA ligase D                                                                 | L           | Replication, recombination and repair                        |
| PFSS101_2497 | 2.264539086 | down        |            | Ku protein                                                                   | S           | Function unknown                                             |
| PFSS101_2500 | 2.038978788 | down        |            | conserved hypothetical protein                                               | S           | Function unknown                                             |
| PFSS101_2501 | 2.234040604 | down        |            | transcriptional regulator, TetR family                                       | K           | Transcription                                                |
| PFSS101_2560 | 2.469946384 | up          | aprA       | extracellular alkaline metalloprotease AprA                                  | X           | Not in COGs                                                  |
| PFSS101_2575 | 2.571957152 | down        |            | conserved hypothetical protein                                               | X           | Not in COGs                                                  |
| PFSS101_2577 | 2.32819962  | down        |            | transporter, CPA2 family                                                     | P           | Inorganic ion transport and metabolism                       |
| PFSS101_2591 | 2.039049786 | down        |            | transcriptional regulator, LuxR family                                       | T           | Signal transduction mechanisms                               |
| PFSS101_2598 | 2.762475967 | up          |            | formyl transferase domain_ enoyl-CoA hydratase/isomerase family protein      | J           | Translation                                                  |
| PFSS101_2627 | 2.473874361 | down        |            | putative K+ channel protein                                                  | T           | Signal transduction mechanisms                               |
| PFSS101_2683 | 2.146178222 | down        |            | putative DNA topoisomerase I                                                 | L           | Replication, recombination and repair                        |
| PFSS101_2820 | 3.261658451 | down        | pstS2      | phosphate ABC transporter, phosphate-binding protein PstS2                   | P           | Inorganic ion transport and metabolism                       |
| PFSS101_2840 | 3.091795206 | up          | yveA       | aspartate_proton symporter YveA                                              | E           | Amino acid transport and metabolism                          |
| PFSS101_2841 | 3.630767107 | up          |            | proline catabolase family protein                                            | E           | Amino acid transport and metabolism                          |
| PFSS101_2842 | 4.097471237 | up          |            | dihydrodipicolinate synthetase family protein                                | E           | Amino acid transport and metabolism                          |
| PFSS101_2843 | 3.92638731  | up          | aldH_2     | NADP-dependent fatty aldehyde dehydrogenase                                  | C           | Energy production and conversion                             |
| PFSS101_2844 | 2.884896994 | up          |            | FAD dependent oxidoreductase                                                 | E           | Amino acid transport and metabolism                          |
| PFSS101_2914 | 2.191737652 | up          |            | conserved hypothetical protein                                               | X           | Not in COGs                                                  |
| PFSS101_2982 | 2.611388206 | up          |            | putative lipoprotein                                                         | X           | Not in COGs                                                  |
| PFSS101_3033 | 2.116470081 | down        |            | amino acid ABC transporter, permease protein, 3-TM region, His/Glu/Gln/Arg/E | E           | Amino acid transport and metabolism                          |
| PFSS101_3049 | 2.472496271 | up          |            | conserved hypothetical protein                                               | S           | Function unknown                                             |
| PFSS101_3152 | 2.160084301 | down        |            | tRNA-Ser                                                                     | O           | 0                                                            |
| PFSS101_3183 | 2.443406706 | down        |            | glutathione S-transferase, C-terminal domain protein                         | O           | Posttranslational modification, protein turnover, chaperones |
| PFSS101_3223 | 2.341401274 | down        |            | conserved hypothetical protein                                               | X           | Not in COGs                                                  |
| PFSS101_3224 | 2.714154895 | down        |            | conserved hypothetical protein                                               | X           | Not in COGs                                                  |
| PFSS101_3225 | 2.485192984 | down        |            | hypothetical protein                                                         | X           | Not in COGs                                                  |
| PFSS101_3238 | 2.01956863  | down        |            | conserved hypothetical protein                                               | S           | Function unknown                                             |
| PFSS101_3334 | 2.604944798 | down        |            | NAD dependent epimerase_dehydratase family protein                           | M           | Cell wall/membrane biogenesis                                |
| PFSS101_3335 | 2.35556029  | down        |            | SRP-30_Gluonuclease_19E family protein                                       | G           | Carbohydrate transport and metabolism                        |
| PFSS101_3395 | 2.887057781 | up          | massA      | non-ribosomal peptide synthetase MassA                                       | Q           | Secondary metabolites biosynthesis, transport and catabolism |
| PFSS101_3396 | 2.467630303 | up          |            | transcriptional regulator, LuxR family                                       | T           | Signal transduction mechanisms                               |
| PFSS101_3398 | 2.182132244 | up          | nodT       | efflux transporter, outer membrane factor lipoprotein, NodT family           | M           | Cell wall/membrane biogenesis                                |
| PFSS101_3564 | 2.377555609 | up          |            | conserved hypothetical protein                                               | X           | Not in COGs                                                  |
| PFSS101_3655 | 2.143716195 | down        |            | conserved hypothetical protein                                               | X           | Not in COGs                                                  |
| PFSS101_3821 | 2.063116312 | up          |            | NipC_P60 family protein                                                      | M           | Cell wall/membrane biogenesis                                |
| PFSS101_3840 | 5.277371883 | up          | speB       | agmatinase                                                                   | E           | Amino acid transport and metabolism                          |
| PFSS101_3841 | 5.169645309 | up          |            | transporter, SSS family                                                      | E           | Amino acid transport and metabolism                          |
| PFSS101_3854 | 2.9566411   | down        |            | conserved hypothetical protein                                               | X           | Not in COGs                                                  |
| PFSS101_3871 | 4.32712371  | down        |            | conserved hypothetical protein                                               | X           | Not in COGs                                                  |
| PFSS101_3883 | 3.583265305 | up          | cco_1      | cytochrome c oxidase, ccb3-type, subunit II                                  | C           | Energy production and conversion                             |
| PFSS101_3897 | 2.74943924  | up          | hemN       | coproporphyrinogen dehydrogenase                                             | H           | Coenzyme transport and metabolism                            |
| PFSS101_3938 | 2.07582736  | up          |            | PF04320 family protein                                                       | S           | Function unknown                                             |
| PFSS101_4081 | 2.476959467 | up          |            | PhrS RNA                                                                     | O           | 0                                                            |
| PFSS101_4103 | 3.1138134   | up          |            | short chain dehydrogenase_reductase family protein                           | I           | Lipid transport and metabolism                               |
| PFSS101_4143 | 2.091628655 | up          | ribH_2     | 6,7-dimethyl-8-ribitylmurazine synthase                                      | H           | Coenzyme transport and metabolism                            |
| PFSS101_4163 | 2.098148883 | down        |            | HAD hydrolase, family IB                                                     | E           | Amino acid transport and metabolism                          |
| PFSS101_4250 | 2.047661304 | up          |            | conserved hypothetical protein                                               | X           | Not in COGs                                                  |
| PFSS101_4272 | 3.595455362 | up          | gcvH_2     | glycine cleavage system H protein                                            | E           | Amino acid transport and metabolism                          |
| PFSS101_4273 | 2.157778502 | up          | gcvP       | glycine dehydrogenase                                                        | E           | Amino acid transport and metabolism                          |
| PFSS101_4366 | 2.242273808 | up          |            | conserved hypothetical protein                                               | X           | Not in COGs                                                  |
| PFSS101_4477 | 2.242925474 | down        |            | response regulator                                                           | T           | Signal transduction mechanisms                               |
| PFSS101_4540 | 2.158946861 | down        |            | NAD dependent epimerase_dehydratase family protein                           | M           | Cell wall/membrane biogenesis                                |
| PFSS101_4671 | 2.322312377 | down        |            | elongation factor, GreA_GreB family                                          | K           | Transcription                                                |
| PFSS101_4697 | 2.192515603 | down        |            | aldehyde oxidase and xanthine dehydrogenase family protein                   | C           | Energy production and conversion                             |
| PFSS101_4699 | 2.097925741 | down        |            | 2Fe-2S iron-sulfur cluster binding domain protein                            | C           | Energy production and conversion                             |
| PFSS101_4738 | 2.161044359 | up          |            | sRNA P24                                                                     | O           | 0                                                            |
| PFSS101_4796 | 2.671133757 | up          | ppa        | inorganic diphosphatase                                                      | C           | Energy production and conversion                             |
| PFSS101_4811 | 2.225212336 | up          | xseB       | exodeoxyribonuclease VII, small subunit                                      | L           | Replication, recombination and repair                        |
| PFSS101_4834 | 2.567535639 | up          | oprG       | outer membrane protein OprG                                                  | M           | Cell wall/membrane biogenesis                                |
| PFSS101_4837 | 2.639831168 | down        |            | PF01904 family protein                                                       | S           | Function unknown                                             |
| PFSS101_4838 | 2.435756391 | down        |            | endonuclease_exonuclease_dehydratase family protein                          | R           | General function prediction only                             |
| PFSS101_4839 | 2.35506173  | down        |            | putative cardiolipin synthetase YbhO                                         | I           | Lipid transport and metabolism                               |
| PFSS101_4840 | 2.792438227 | down        |            | putative membrane protein                                                    | S           | Function unknown                                             |
| PFSS101_4927 | 2.054293657 | down        |            | DnaI domain protein                                                          | Q           | Posttranslational modification, protein turnover, chaperones |
| PFSS101_5159 | 2.145127783 | down        | cadA_1     | cadmium-exporting ATPase                                                     | P           | Inorganic ion transport and metabolism                       |
| PFSS101_5203 | 2.816554857 | down        | lsfA       | thiol-specific antioxidant protein LsfA                                      | O           | Posttranslational modification, protein turnover, chaperones |
| PFSS101_5210 | 4.734334946 | up          |            | conserved hypothetical protein                                               | X           | Not in COGs                                                  |
| PFSS101_5381 | 2.081254081 | down        | pstS       | phosphate ABC transporter, periplasmic phosphate-binding protein             | P           | Inorganic ion transport and metabolism                       |
| PFSS101_5392 | 2.344167709 | up          | aspA       | aspartate ammonia-lyase                                                      | E           | Amino acid transport and metabolism                          |
| PFSS101_5454 | 2.056929389 | down        |            | cyclopropane-fatty-acyl-phospholipid synthase                                | M           | Cell wall/membrane biogenesis                                |

| Light blue class     |                |                                    |                           |
|----------------------|----------------|------------------------------------|---------------------------|
| m/z at peak centroid | ± m/z interval | m/z with maximal correlation value | Maximal correlation value |
| 994.215              | 1.243          | 994.18                             | 0.507                     |
| 1136.038             | 1.42           | 1136.063                           | 0.672                     |
| 1142.68              | 1.428          | 1142.667                           | 0.579                     |
| 1150.44              | 1.779          | 1151.032                           | 0.727                     |
| 1165.377             | 1.457          | 1165.796                           | 0.606                     |
| 1181.805             | 1.477          | 1181.856                           | 0.539                     |

| Green class          |                |                                    |                           |
|----------------------|----------------|------------------------------------|---------------------------|
| m/z at peak centroid | ± m/z interval | m/z with maximal correlation value | Maximal correlation value |
| 249.575              | 0.312          | 249.575                            | 0.559                     |
| 265.578              | 0.332          | 265.548                            | 0.588                     |
| 445.112              | 0.556          | 445.12                             | 0.543                     |
| 461.112              | 0.576          | 461.136                            | 0.595                     |
| 476.833              | 0.335          | 477.16                             | 0.518                     |
| 477.503              | 0.335          | 477.225                            | 0.54                      |
| 672.38               | 0.84           | 672.361                            | 0.588                     |
| 688.539              | 0.861          | 688.519                            | 0.511                     |
| 740.469              | 0.473          | 740.922                            | 0.517                     |
| 741.415              | 0.473          | 740.962                            | 0.504                     |
| 766.87               | 0.959          | 766.87                             | 0.549                     |
| 1163.397             | 1.454          | 1163.003                           | 0.676                     |
| 1179.645             | 1.475          | 1179.121                           | 0.699                     |
| 1201.933             | 1.502          | 1201.43                            | 0.661                     |

| Orange class         |                |                                    |                           |
|----------------------|----------------|------------------------------------|---------------------------|
| m/z at peak centroid | ± m/z interval | m/z with maximal correlation value | Maximal correlation value |
| 183.895              | 0.23           | 183.95                             | 0.512                     |
| 223.928              | 0.28           | 223.917                            | 0.568                     |
| 257.939              | 0.173          | 258.089                            | 0.502                     |
| 258.286              | 0.173          | 258.136                            | 0.504                     |

| Dark red class       |                |                                    |                           |
|----------------------|----------------|------------------------------------|---------------------------|
| m/z at peak centroid | ± m/z interval | m/z with maximal correlation value | Maximal correlation value |
| 43.338               | 0.229          | 43.25                              | 0.687                     |
| 43.611               | 0.045          | 43.567                             | 0.549                     |
| 88.292               | 0.064          | 88.339                             | 0.519                     |
| 88.42                | 0.064          | 88.374                             | 0.502                     |
| 194.579              | 0.243          | 194.579                            | 0.568                     |
| 232.825              | 0.291          | 232.774                            | 0.76                      |
| 281.931              | 0.352          | 281.956                            | 0.529                     |
| 284.791              | 0.195          | 284.951                            | 0.506                     |
| 285.181              | 0.195          | 285.039                            | 0.526                     |
| 313.524              | 0.768          | 313.136                            | 0.857                     |
| 325.504              | 0.676          | 325.27                             | 0.828                     |
| 326.495              | 0.314          | 326.207                            | 0.585                     |
| 328.747              | 0.221          | 328.944                            | 0.523                     |
| 329                  | 0.032          | 329.012                            | 0.513                     |
| 329.254              | 0.223          | 329.039                            | 0.525                     |
| 353.334              | 0.442          | 353.251                            | 0.623                     |
| 369.37               | 0.462          | 369.249                            | 0.776                     |
| 373.272              | 0.467          | 373.179                            | 0.539                     |
| 454.097              | 0.292          | 454.373                            | 0.512                     |
| 454.68               | 0.292          | 454.404                            | 0.53                      |
| 552.543              | 1.152          | 551.949                            | 0.871                     |
| 555.688              | 0.695          | 555.705                            | 0.516                     |
| 564.888              | 1.562          | 564.12                             | 0.896                     |
| 576.032              | 0.72           | 575.96                             | 0.753                     |
| 592.353              | 0.876          | 592.217                            | 0.847                     |
| 604.505              | 1.013          | 604.13                             | 0.877                     |
| 616.27               | 0.491          | 616.549                            | 0.572                     |
| 616.955              | 0.194          | 617.121                            | 0.561                     |
| 617.622              | 0.474          | 617.213                            | 0.565                     |
| 626.435              | 0.836          | 626.193                            | 0.839                     |
| 648.201              | 0.81           | 648.219                            | 0.77                      |
| 684.044              | 0.855          | 684.063                            | 0.605                     |
| 703.918              | 0.46           | 704.339                            | 0.507                     |
| 704.58               | 0.202          | 704.713                            | 0.637                     |
| 705.406              | 0.623          | 704.812                            | 0.639                     |
| 715.294              | 1.162          | 714.767                            | 0.88                      |
| 727.495              | 1.162          | 727.535                            | 0.885                     |
| 737.188              | 0.642          | 737.811                            | 0.571                     |
| 738.199              | 0.368          | 738.416                            | 0.678                     |
| 739.216              | 0.649          | 738.618                            | 0.682                     |
| 743.482              | 0.929          | 743.675                            | 0.847                     |
| 747.093              | 0.934          | 747.164                            | 0.664                     |
| 750.631              | 1.293          | 750.498                            | 0.769                     |
| 765.276              | 0.957          | 765.307                            | 0.683                     |
| 769.257              | 0.507          | 769.753                            | 0.52                      |
| 770.271              | 0.507          | 769.774                            | 0.514                     |
| 780.708              | 0.976          | 780.677                            | 0.52                      |
| 790.017              | 0.988          | 789.985                            | 0.511                     |
| 957.25               | 1.197          | 957.296                            | 0.569                     |

| Locustag | Genes | Gene descriptions                                                           | Fold change      | P value-FDR |
|----------|-------|-----------------------------------------------------------------------------|------------------|-------------|
| PFLU0062 |       | hypothetical protein                                                        | 2.141166897 down | 0.000867    |
| PFLU0063 |       | hypothetical protein                                                        | 2.038700049 down | 0.00127     |
| PFLU0064 |       | putative two-component system response regulator                            | 2.091669342 down | 0.000179    |
| PFLU0066 |       | putative substrate-binding periplasmic protein                              | 2.23616114 down  | 0.000241    |
| PFLU0075 |       | beta alanine--pyruvate transaminase                                         | 3.459464312 up   | 0.00124     |
| PFLU0076 | mmsA  | methylmalonate-semialdehyde dehydrogenase                                   | 3.210054874 up   | 0.00123     |
| PFLU0073 |       | hypothetical protein                                                        | 3.903486906 down | 0.000852    |
| PFLU0074 | fumC  | fumarate hydratase                                                          | 2.935147152 down | 0.0002      |
| PFLU0075 |       | hypothetical protein                                                        | 2.664475865 down | 0.000599    |
| PFLU0076 | sodA  | superoxide dismutase                                                        | 2.771515851 down | 0.000876    |
| PFLU0097 |       | hypothetical protein                                                        | 4.870885525 down | 0.0108      |
| PFLU0094 |       | hypothetical protein                                                        | 2.756617184 down | 0.000715    |
| PFLU0095 |       | hypothetical protein                                                        | 2.412969593 down | 0.00146     |
| PFLU0090 | algD  | GDP-mannose 6-dehydrogenase                                                 | 2.210777521 up   | 0.000406    |
| PFLU1050 |       | putative DNA-binding protein                                                | 2.129960537 up   | 0.00086     |
| PFLU1172 |       | hypothetical protein                                                        | 2.032741658 down | 0.00426     |
| PFLU1174 |       | putative phage tail-like protein                                            | 2.459479616 down | 0.019       |
| PFLU1176 |       | putative phage-like protein                                                 | 2.092829914 down | 0.00444     |
| PFLU1177 |       | hypothetical protein                                                        | 2.530116817 down | 0.0228      |
| PFLU1178 |       | putative phage tail-like protein                                            | 2.61762453 down  | 0.0166      |
| PFLU1179 |       | putative phage tail-like protein                                            | 2.519406781 down | 0.00834     |
| PFLU1180 |       | putative phage hypothetical protein                                         | 2.27525252 down  | 0.015       |
| PFLU1181 |       | putative phage hypothetical protein                                         | 2.851199211 down | 0.00912     |
| PFLU1366 | pcaH  | protocatechuate 3,4-dioxygenase subunit beta                                | 2.621680021 up   | 0.00544     |
| PFLU1367 | pcaG  | protocatechuate 3,4-dioxygenase alpha chain                                 | 2.141105413 up   | 0.00234     |
| PFLU1391 |       | putative acyltransferase                                                    | 2.392966307 down | 0.00868     |
| PFLU1392 |       | hypothetical protein                                                        | 3.390410538 down | 0.0026      |
| PFLU1439 |       | putative lipoprotein                                                        | 2.539231007 down | 0.000164    |
| PFLU1448 |       | putative transporter-like membrane protein                                  | 4.535796642 up   | 0.00216     |
| PFLU1449 |       | putative transporter-like exported protein                                  | 3.014289618 up   | 0.00483     |
| PFLU1450 |       | hypothetical protein                                                        | 3.103611231 up   | 0.00501     |
| PFLU1492 |       | hypothetical protein                                                        | 2.39845627 down  | 0.00124     |
| PFLU1493 |       | hypothetical protein                                                        | 2.494904116 down | 0.00079     |
| PFLU1502 |       | putative dehydrogenase                                                      | 4.06276083 up    | 0.000163    |
| PFLU1503 |       | hypothetical protein                                                        | 5.193297386 up   | 0.0002      |
| PFLU1551 |       | hypothetical protein                                                        | 2.116040171 down | 0.00024     |
| PFLU1771 |       | putative p-aminobenzoic acid synthase                                       | 2.249596357 up   | 0.0117      |
| PFLU1772 |       | putative chorismate mutase/prephenate dehydrogenase                         | 2.313663721 up   | 0.0156      |
| PFLU1773 |       | hypothetical protein                                                        | 2.44193697 up    | 0.00918     |
| PFLU1774 |       | putative methyltransferase                                                  | 2.454258442 up   | 0.00444     |
| PFLU1775 |       | putative oxidoreductase                                                     | 2.613559961 up   | 0.0064      |
| PFLU1778 | phnD  | phosphonates ABC transporter substrate-binding periplasmic protein          | 2.01677822 down  | 0.0124      |
| PFLU1791 |       | hypothetical protein                                                        | 2.181700673 down | 0.000181    |
| PFLU2021 |       | putative transporter-like membrane protein                                  | 4.98244381 up    | 0.0000529   |
| PFLU2022 |       | putative dipeptidyl peptidase                                               | 7.180238724 up   | 0.0000443   |
| PFLU2023 |       | putative LysR family regulatory protein                                     | 5.214242458 up   | 0.0000955   |
| PFLU2054 |       | hypothetical protein                                                        | 2.779976638 down | 0.000687    |
| PFLU2091 |       | hypothetical protein                                                        | 2.029107809 up   | 0.000873    |
| PFLU2092 |       | hypothetical protein                                                        | 2.07054528 up    | 0.000846    |
| PFLU2093 |       | putative dehydrogenase                                                      | 2.17754221 up    | 0.000675    |
| PFLU2352 |       | putative oxidoreductase                                                     | 7.034337182 down | 0.000875    |
| PFLU2353 |       | hypothetical protein                                                        | 6.098324909 down | 0.0109      |
| PFLU2354 |       | putative aldolase                                                           | 6.664996566 down | 0.000486    |
| PFLU2355 |       | putative transporter-like membrane protein                                  | 7.341900743 down | 0.000569    |
| PFLU2356 |       | putative isomerase                                                          | 4.724287904 down | 0.0008      |
| PFLU2471 | tsx   | nucleoside-specific channel-forming protein                                 | 2.052359051 up   | 0.00145     |
| PFLU2522 |       | hypothetical protein                                                        | 2.063405207 down | 0.00851     |
| PFLU2552 | viscC | putative non-ribosomal peptide synthetase                                   | 2.088464499 up   | 0.00145     |
| PFLU2553 | viscB | putative non-ribosomal peptide synthetase                                   | 2.129778147 up   | 0.00106     |
| PFLU2556 |       | macrolide-specific ABC-type efflux carrier                                  | 2.228133678 up   | 0.000772    |
| PFLU2596 |       | hypothetical protein                                                        | 2.549250019 down | 0.000573    |
| PFLU2617 |       | putative ABC-type amino-acid transporter periplasmic solute-binding protein | 2.070101211 down | 0.00342     |
| PFLU2757 |       | hypothetical protein                                                        | 2.049401083 down | 0.00236     |
| PFLU2792 |       | putative molybdenum-pterin binding protein II                               | 2.12064651 down  | 0.0017      |
| PFLU2915 |       | hypothetical protein                                                        | 2.242607824 down | 0.00362     |
| PFLU2916 |       | putative LysR family regulatory protein                                     | 2.488963 down    | 0.000687    |
| PFLU3096 |       | putative aminotransferase                                                   | 2.173573767 down | 0.000881    |
| PFLU3188 |       | glyoxalase/bleomycin resistance protein/dioxygenase superfamily protein     | 2.153156129 down | 0.00507     |
| PFLU3219 |       | SyrP-like protein                                                           | 2.179120149 down | 0.000601    |
| PFLU3315 |       | phosphate ABC transporter ATP-binding protein                               | 3.650459462 down | 0.00354     |
| PFLU3316 |       | phosphate transporter permease                                              | 2.938114838 down | 0.00635     |
| PFLU3317 |       | phosphate transporter permease                                              | 3.222665823 down | 0.0092      |
| PFLU3318 |       | putative phosphate-binding periplasmic protein                              | 6.50485614 down  | 0.00124     |
| PFLU3323 |       | putative amino acid permease membrane protein                               | 6.798057079 up   | 0.000242    |
| PFLU3324 |       | hypothetical protein                                                        | 6.564079762 up   | 0.000596    |
| PFLU3325 |       | putative ribosome biosynthesis/dihydrogolicoline synthase                   | 7.021745205 up   | 0.000151    |
| PFLU3326 |       | putative fatty aldehyde dehydrogenase                                       | 5.737107754 up   | 0.000408    |
| PFLU3327 |       | putative D-amino acid dehydrogenase                                         | 5.193924427 up   | 0.00018     |
| PFLU3372 |       | hypothetical protein                                                        | 2.110782623 up   | 0.00317     |
| PFLU3525 |       | putative acyl-CoA synthetase                                                | 2.666406393 up   | 0.0159      |
| PFLU3526 |       | acetyl-CoA acetyltransferase                                                | 2.319811821 up   | 0.0135      |
| PFLU3527 |       | putative dehydratase                                                        | 2.314392567 up   | 0.0469      |
| PFLU3528 | fabG  | 3-ketoacyl-(acyl-carrier-protein) reductase                                 | 2.498208046 up   | 0.0214      |
| PFLU3529 |       | acyl-CoA dehydrogenase                                                      | 7.878198147 up   | 0.00218     |
| PFLU3532 |       | putative fatty acid transporter membrane protein                            | 10.29052544 up   | 0.00218     |
| PFLU3533 | praB  | hypothetical protein                                                        | 14.27752113 up   | 0.00137     |
| PFLU3534 | praA  | hypothetical protein                                                        | 12.75898743 up   | 0.00172     |
| PFLU3535 | alkB  | putative alkane monooxygenase                                               | 9.506877899 up   | 0.00144     |
| PFLU3536 |       | putative family S33 unassigned peptidase                                    | 4.461949825 up   | 0.00413     |
| PFLU3537 |       | putative flavin-binding monooxygenase-like protein                          | 5.785268784 up   | 0.00307     |
| PFLU3538 |       | putative short chain dehydrogenase                                          | 6.896756172 up   | 0.00284     |
| PFLU3539 |       | hypothetical protein                                                        | 8.342073441 up   | 0.0022      |
| PFLU3655 |       | hypothetical protein                                                        | 3.193384132 down | 0.000872    |
| PFLU3656 |       | hypothetical protein                                                        | 2.825365382 down | 0.000153    |
| PFLU3657 |       | hypothetical protein                                                        | 2.232430151 down | 0.00028     |
| PFLU3658 |       | putative extracellular polysaccharide biosynthesis protein                  | 4.194696991 down | 0.000853    |
| PFLU3662 |       | putative polysaccharide export protein                                      | 2.116813626 down | 0.00235     |
| PFLU3663 |       | hypothetical protein                                                        | 3.071488117 down | 0.000496    |
| PFLU3678 |       | putative protein-tyrosine phosphatase                                       | 7.648847775 down | 0.000175    |
| PFLU3679 |       | pseudo                                                                      | 2.537927129 down | 0.00323     |
| PFLU3745 |       | putative ABC transporter ATP-binding protein                                | 2.133700286 down | 0.0347      |
| PFLU3746 |       | ATP-binding ABC transporter protein                                         | 2.059562032 down | 0.043       |
| PFLU3759 |       | hypothetical protein                                                        | 2.066760545 down | 0.000178    |
| PFLU3970 |       | ornithine cyclodeaminase                                                    | 2.045771054 down | 0.000672    |
| PFLU3981 |       | putative GntR family transcriptional regulator                              | 3.931177378 up   | 0.00195     |
| PFLU3982 |       | hypothetical protein                                                        | 2.586524248 up   | 0.0102      |
| PFLU3999 |       | hypothetical protein                                                        | 2.540869043 down | 0.00917     |
| PFLU4007 | viscA | putative non-ribosomal peptide synthetase                                   | 2.383148193 up   | 0.000486    |
| PFLU4154 |       | putative inosine-uridine preferring nucleoside hydrolase                    | 2.492651939 up   | 0.000908    |
| PFLU4155 |       | D-ribose pyranase                                                           | 2.040247202 up   | 0.0104      |
| PFLU4158 |       | putative ribose transporter permease                                        | 2.098598719 up   | 0.00524     |
| PFLU4161 |       | putative L-asparaginase II                                                  | 2.023008108 up   | 0.000881    |
| PFLU4308 |       | putative signalling-related membrane protein                                | 2.207138106 down | 0.000144    |
| PFLU4332 |       | long-chain-acyl-CoA synthetase                                              | 2.106747627 up   | 0.000253    |
| PFLU4389 | pvdS  | extracytoplasmic-function sigma-70 factor                                   | 2.118157771 down | 0.00491     |
| PFLU4461 |       | hypothetical protein                                                        | 2.148806661 down | 0.0142      |
| PFLU4510 |       | agmatinase                                                                  | 11.27319431 up   | 0.0000564   |
| PFLU4511 |       | hypothetical protein                                                        | 8.390299797 up   | 0.000172    |
| PFLU4512 |       | putative transmembrane transport protein                                    | 3.863761187 up   | 0.000869    |
| PFLU4513 |       | putative sodium/solute symporter                                            | 5.941126323 up   | 0.000189    |
| PFLU4536 |       | hypothetical protein                                                        | 7.46376786 down  | 0.013       |
| PFLU4853 |       | hypothetical protein                                                        | 2.676332474 up   | 0.00511     |
| PFLU4854 |       | LysE-type translocator                                                      | 2.098562479 up   | 0.0116      |
| PFLU4889 |       | putative amino acid transporter integral membrane protein                   | 2.22968815 down  | 0.000575    |
| PFLU4896 |       | glycine cleavage system protein H                                           | 3.21936965 up    | 0.000598    |
| PFLU5174 |       | hypothetical protein                                                        | 2.404265858 down | 0.00087     |
| PFLU5615 | bioB  | biotin synthase                                                             | 2.368963964 down | 0.000179    |
| PFLU5618 |       | hypothetical protein                                                        | 3.313442663 down | 0.00125     |
| PFLU5656 |       | putative oxidase                                                            | 2.53435421 up    | 0.000333    |
| PFLU5657 |       | putative amine-transport related membrane protein                           | 2.165042639 up   | 0.000852    |
| PFLU5859 |       | putative oxidoreductase                                                     | 2.783037739 down | 0.000288    |
| PFLU6048 |       | putative phosphate ABC transporter periplasmic substrate-binding protein    | 4.45596968 down  | 0.00216     |
| PFLU6057 | aspA  | aspartate ammonia-lyase                                                     | 3.497068405 up   | 0.000157    |
| PFLU6061 | aphA  | acetylpolymine aminohydrolase                                               | 3.407876968 up   | 0.00133     |
| PFLU6062 | potF  | putrescine/polyamine-binding periplasmic protein                            | 3.177605629 up   | 0.000801    |



| Parent mass | Classes |
|-------------|---------|
| 970.591     | T       |
| 1140.726    | T       |
| 1148.68     | T       |
| 1157.742    | T       |
| 1158.77     | T       |
| 1162.681    | S       |
| 1162.709    | ST      |
| 1163.767    | ST      |
| 1164.85     | T       |
| 1178.684    | ST      |
| 1178.687    | S       |
| 1180.69     | T       |
| 1182.67     | T       |
| 1184.77     | T       |
| 1186.95     | T       |

| Parent mass | Classes                  |
|-------------|--------------------------|
| 311.307     | protozoa and interaction |
| 325.322     | Interaction              |
| 325.323     | Interaction              |
| 451.461     | protozoa and interaction |
| 451.462     | Interaction              |
| 477.478     | Interaction              |
| 477.478     | Interaction              |
| 477.478     | Interaction              |
| 477.479     | Interaction              |

| Parent mass | Classes |
|-------------|---------|
| 752.518     | T       |
| 766.536     | T       |
| 768.495     | T       |
| 770.517     | S       |
| 772.594     | T       |
| 782.513     | T       |
| 782.514     | T       |
| 782.56      | T       |
| 796.531     | AT      |
